# Supplementary material for: Mesoscopic calcium imaging in a head-unrestrained male non-human primate using a lensless microscope
Source: PubMed Central journal article supplement (PMC10858944; doi:10.1038/s41467-024-45417-6), 2024-02-10
Supplement: 41467_2024_45417_MOESM1_ESM.pdf [file 41467_2024_45417_MOESM1_ESM.pdf]

## Contents

### Supplementary figures

Supplementary Fig. 1 | Weights of reported head-mounted devices on different animal models.

Supplementary Fig. 2 | FOV comparison with current miniaturized fluorescence microscopes used for imaging head-unrestrained NHPs.

Supplementary Fig. 3 | Phase mask design and fabrication.

Supplementary Fig. 4 | Resolution characterization over the whole FOV.

Supplementary Fig. 5 | In vivo imaging setups and epifluorescence images.

Supplementary Fig. 6 | Calibration of spatially variant PSFs.

Supplementary Fig. 7 | Bio-FlatScopeNHP housing design and illumination profile.

Supplementary Fig. 8 | Comparison of different reconstruction models.

Supplementary Fig. 9 | Root-mean-square (RMS) maps for selecting ROIs.

Supplementary Fig. 10 | Additional results for spatial response profiles measured from V1 in the right hemisphere of a head-fixed NHP.

Supplementary Fig. 11 | Additional results for columnar-scale signals measured from V1 in the right hemisphere of a head-fixed NHP.

Supplementary Fig. 12 | Comparison between head-fixed and head-unrestrained imaging using Bio-FlatScopeNHP in the same imaging session.

Supplementary Fig. 13 | Stability of Bio-FlatScopeNHP imaging on a head-unrestrained macaque.

Supplementary Fig. 14 | Correlation coefficient between random maps and ground truth.

Supplementary Fig. 15 | Heartbeat artifact removal.

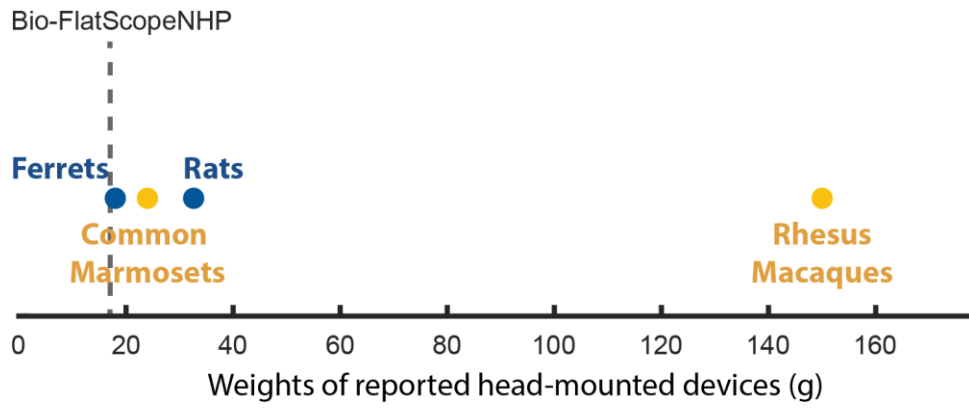

**Supplementary Fig. 1 | Weights of reported head-mounted devices on different animal models.** Bio-FlatScopeNHP has a lighter weight compared to the reported devices used on ferrets<sup>1</sup>, rats<sup>2</sup>, and NHPs including common marmosets<sup>3</sup> and rhesus macaques<sup>4</sup>.

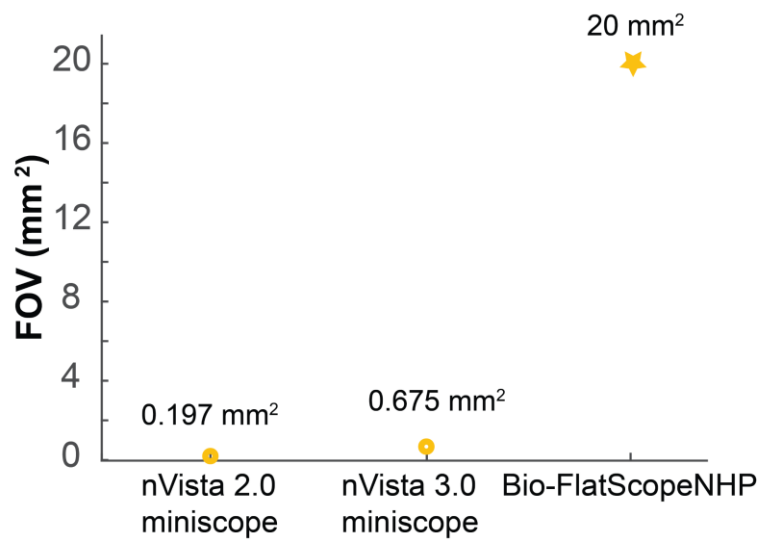

**Supplementary Fig. 2 | FOV comparison with current miniaturized fluorescence microscopes used for imaging head-unrestrained NHPs** (nVista 2.0 miniscope<sup>5</sup>, nVista 3.0 miniscope<sup>6</sup>).

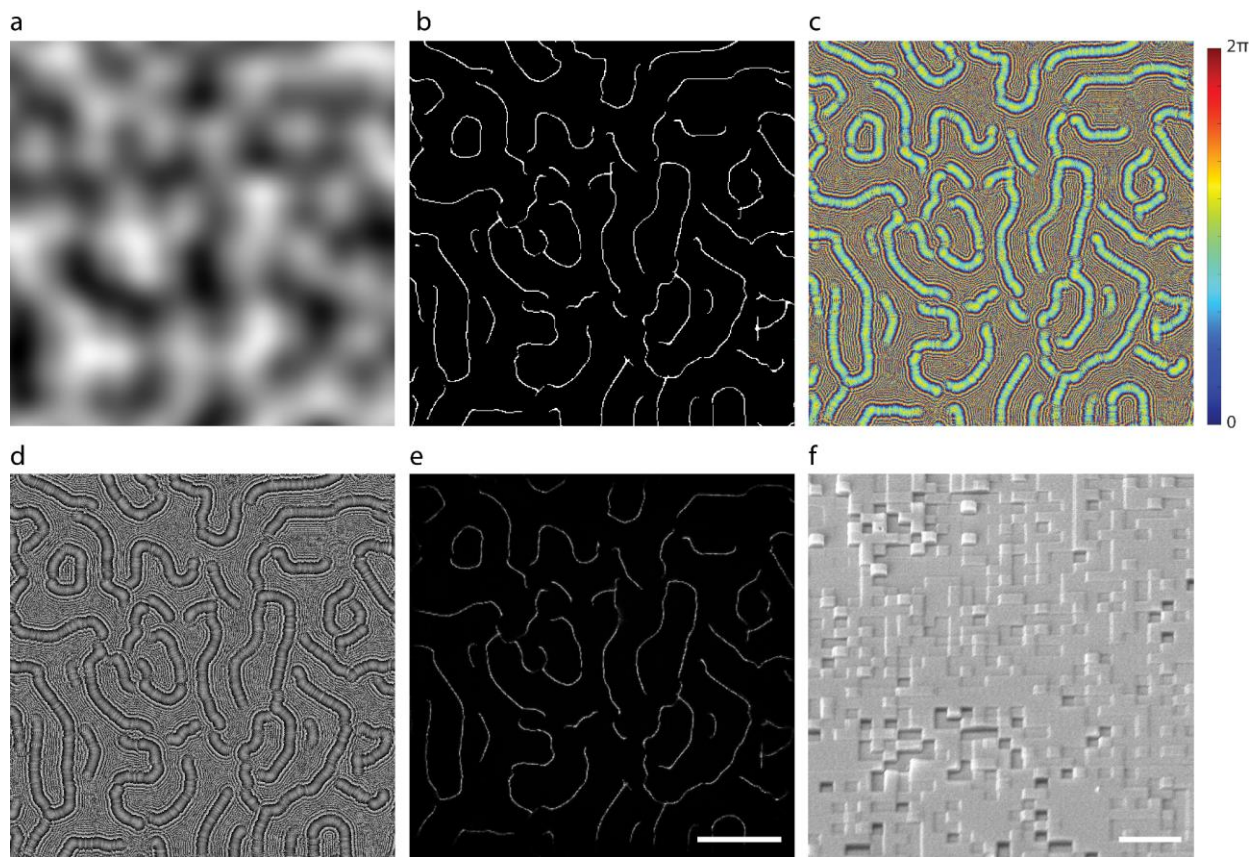

**Supplementary Fig. 3 | Phase mask design and fabrication.** **a**, Perlin noise pattern generated for PSF design. **b**, Designed PSF pattern by applying Canny edge detection to Perlin noise pattern. **c**, Phase map generated by the phase retrieval algorithm for the mask in order to produce the designed PSF pattern on the sensor. **d**, Height map generated with designed focal length for fabrication. **e**, Captured PSF at designed focal length. Scale bar, 500  $\mu\text{m}$ . **f**, Zoomed scanned electron micrograph of a fabricated phase mask with 1  $\mu\text{m}$  fabrication pixel size. Scale bar, 5  $\mu\text{m}$ .

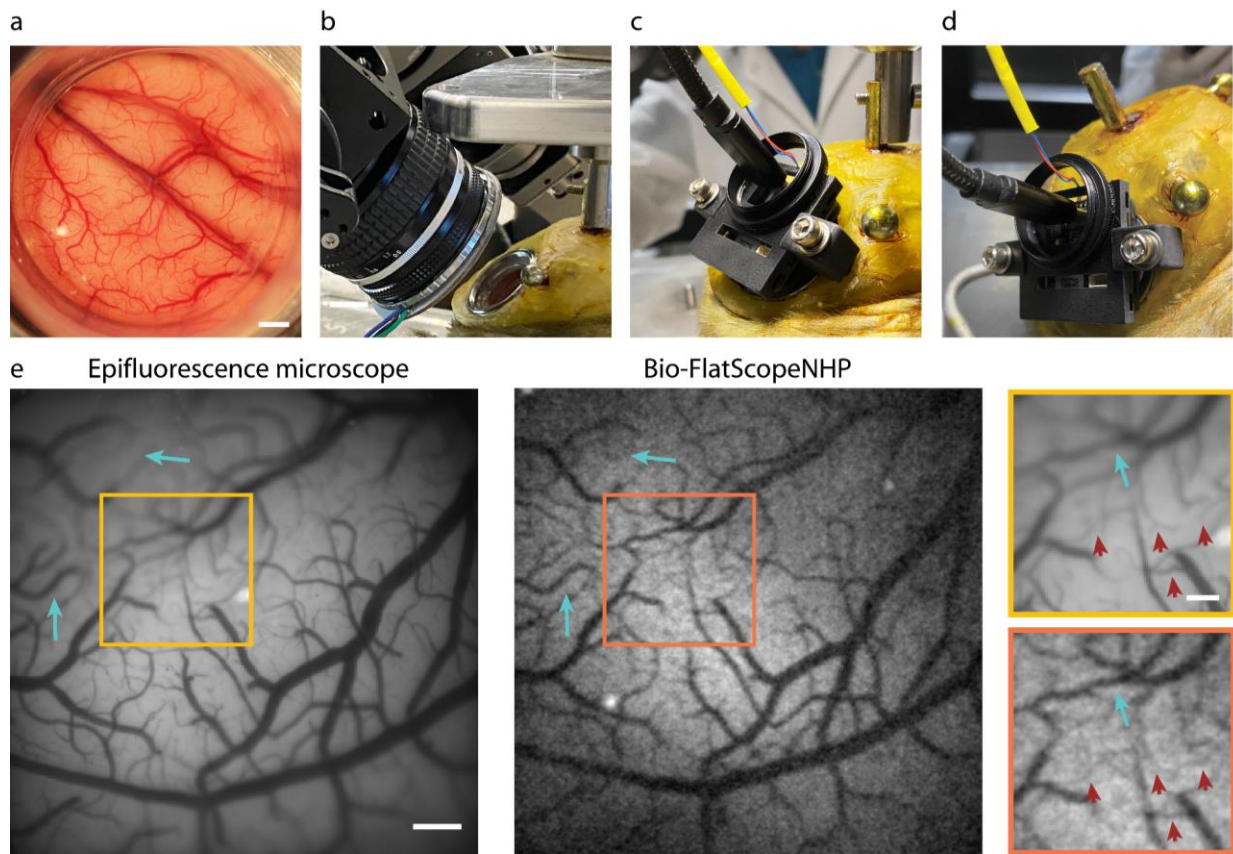

**Supplementary Fig. 4 | In vivo imaging setups and epifluorescence images.** **a**, Photo of one cranial window over V1 of a macaque monkey. Scale bar, 2 mm. **b**, Photo of in vivo imaging of a head-fixed macaque using the table-top widefield microscope. **c**, Photo of in vivo imaging of a head-fixed macaque using Bio-FlatScopeNHP. **d**, Photo of in vivo imaging of a head-unrestrained macaque using Bio-FlatScopeNHP. **e**, High resolution images of a head-fixed macaque captured in vivo by the ground truth widefield microscope and Bio-FlatScopeNHP. Scale bar, 500  $\mu\text{m}$ . Blue arrows indicate regions in the table-top widefield microscope image that are out of focus, while these same areas remain sharply focused in our system. Zoom-in shows Bio-FlatScopeNHP can resolve similar small features as ground truth. Scale bar, 100  $\mu\text{m}$ . Red arrows indicate small blood vessels with 10  $\mu\text{m}$  - 20  $\mu\text{m}$  diameters.

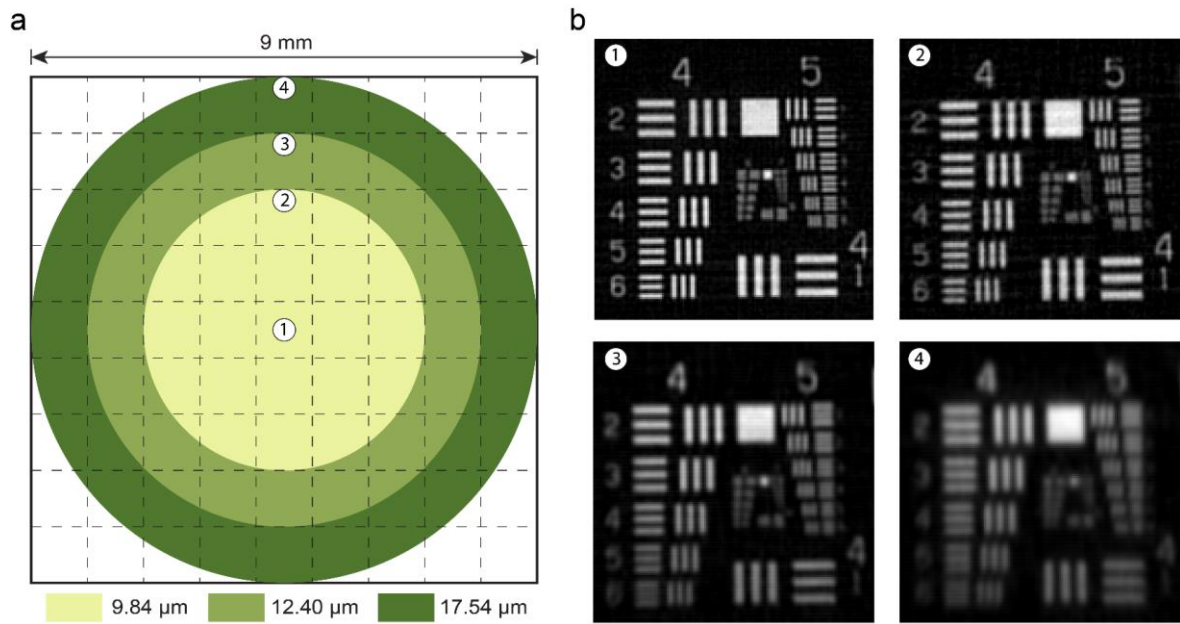

**Supplementary Fig. 5 | Resolution characterization over the whole FOV.** a, Resolution obtained within each specified area across the whole FOV. b, Resolution test target reconstructions using captures from the spatial position indicated in panel a.

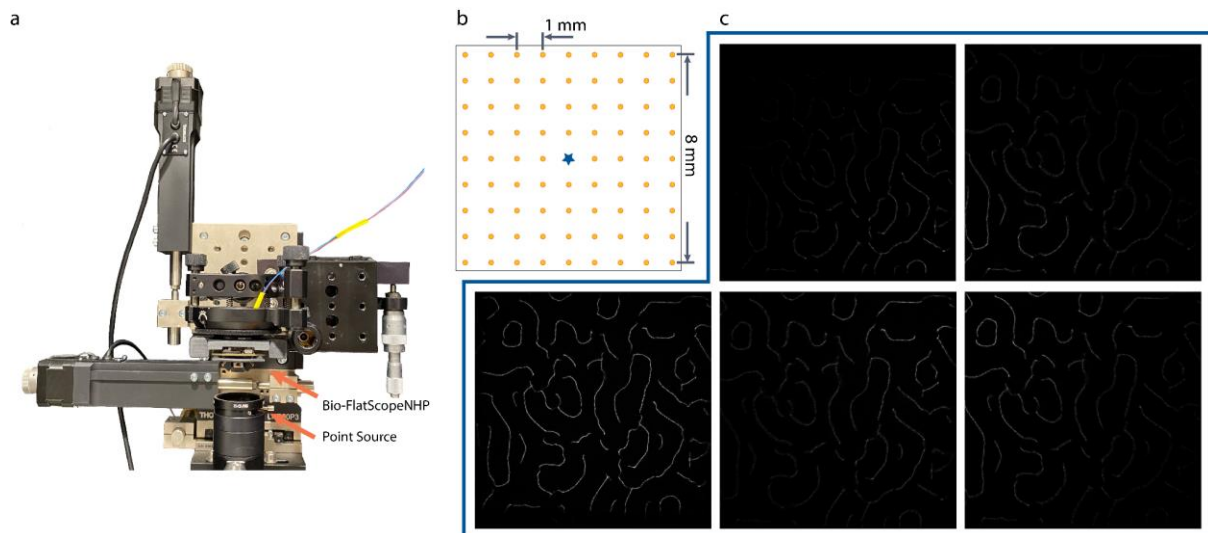

**Supplementary Fig. 6 | Calibration of spatially variant PSFs.** a, Photo of calibration setup for automatic calibration at xyz directions. b, Calibration positions (yellow dots) on a single depth. Blue star indicates the calibration position of center PSF used for fast reconstruction. c, Example PSFs captured at different positions at the 3 mm working distance.

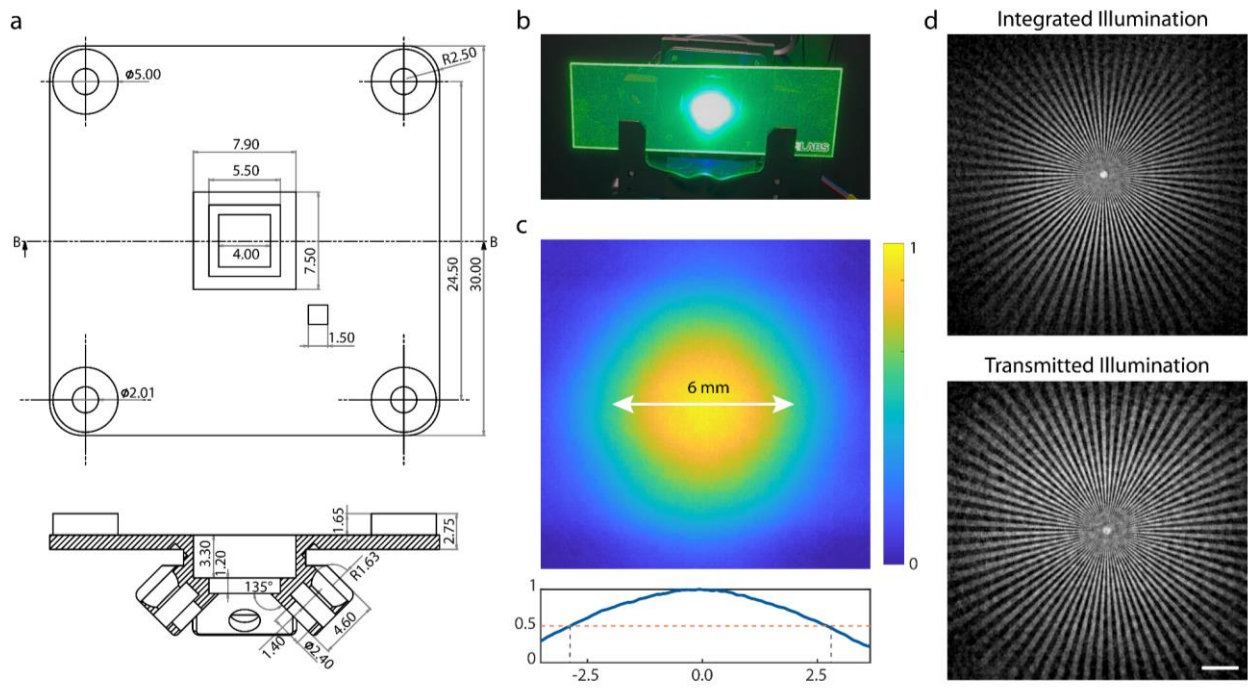

**Supplementary Fig. 7 | Bio-FlatScopeNHP housing design and illumination profile.** **a**, Multiview drawing of the 3D printed housing. Unit, mm. **b**, Photo of illumination pattern on a calibration slide. **c**, Experimental capture of illumination pattern by imaging the calibration slide at 3 mm working distance. Unit of the bottom plot, mm. **d**, Reconstructed images of a star target with a 8 mm  $\times$  8 mm FOV using integrated illumination and transmitted illumination. It demonstrates that illumination is one of the main factors which limits the current FOV of the system. Scale bar, 1 mm.

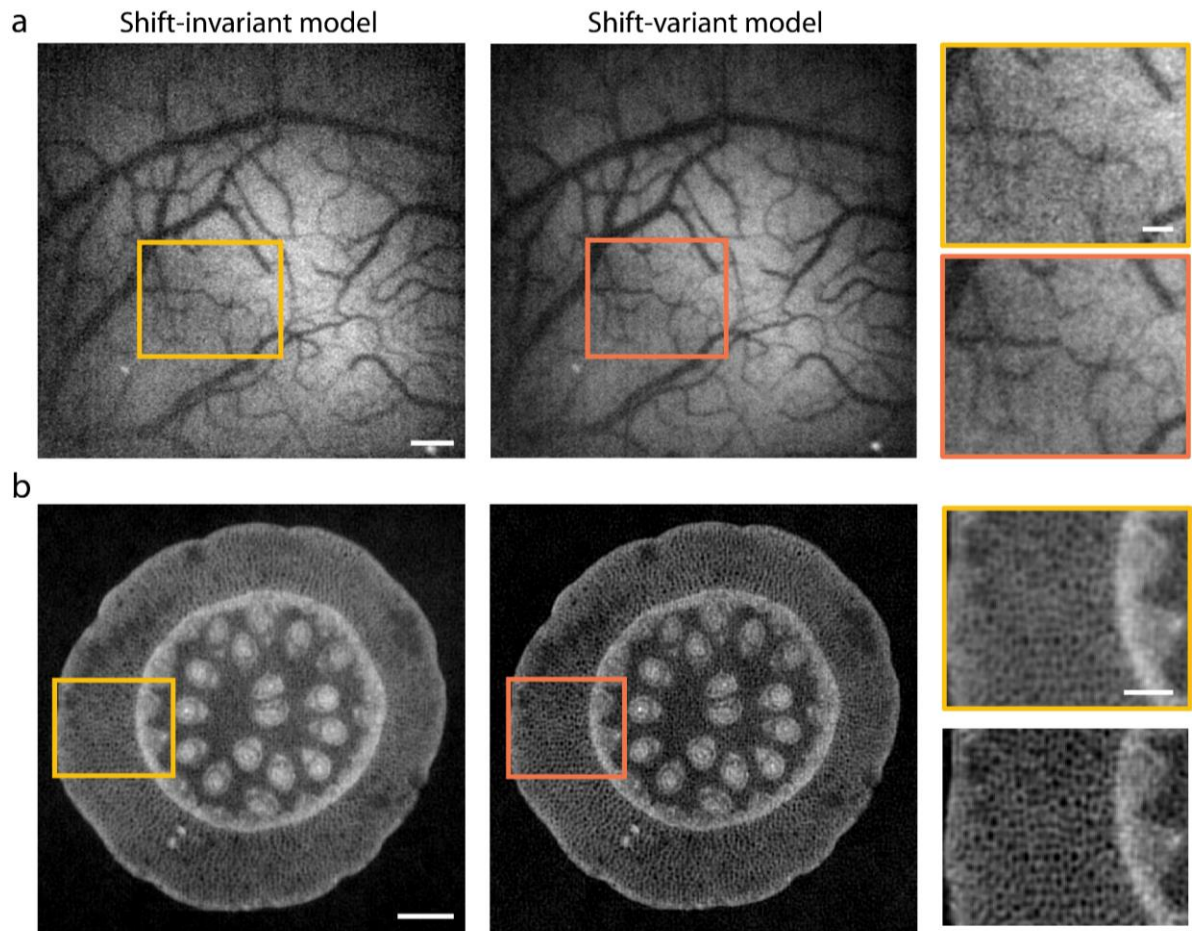

**Supplementary Fig. 8 | Comparison between different reconstruction models. a**, In vivo fluorescence images captured by Bio-FlatScopeNHP and reconstructed using two different models. Scale bar, 500  $\mu\text{m}$ . Zoom-in scale bar, 200  $\mu\text{m}$ . **b**, A stained slice of *Convallaria* Rhizome captured by Bio-FlatScopeNHP and reconstructed using two different models. Scale bar, 500  $\mu\text{m}$ . Zoom-in scale bar, 200  $\mu\text{m}$ .

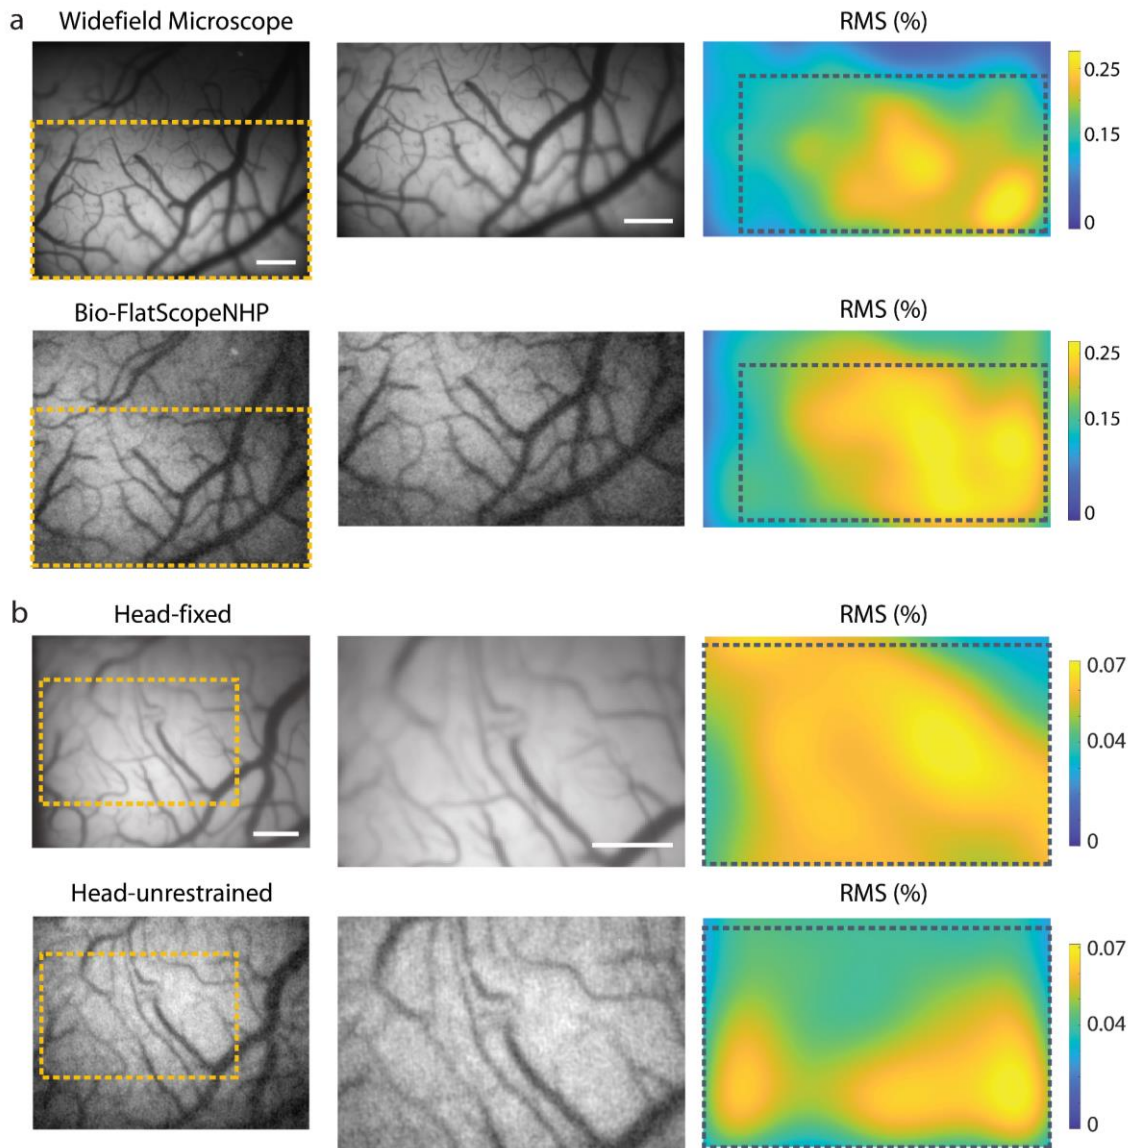

**Supplementary Fig. 9 | Root-mean-square (RMS) maps for selecting ROIs.** **a**, Left: Example image captured on a head-fixed macaque by ground truth widefield microscope (top) and Bio-FlatScopeNHP (bottom). Middle: zoom-ins of the yellow square areas. Right: Root mean square (RMS) map used for region of interest (ROI) selection in ground truth widefield microscope (top) and Bio-FlatScopeNHP (bottom). The gray square indicates the selected overlapping ROI. Scale bar, 500  $\mu\text{m}$ . **b**, Left: Example image captured on a head-fixed macaque by ground truth widefield microscope (top) and a head-unrestrained macaque by Bio-FlatScopeNHP (bottom). Middle: zoom-ins of the yellow square areas. Right: Root mean square (RMS) map used for region of interest (ROI) selection in head-fixed session (top) and head-unrestrained session (bottom). The gray square indicates the selected overlapping ROI. Scale bar, 500  $\mu\text{m}$ .



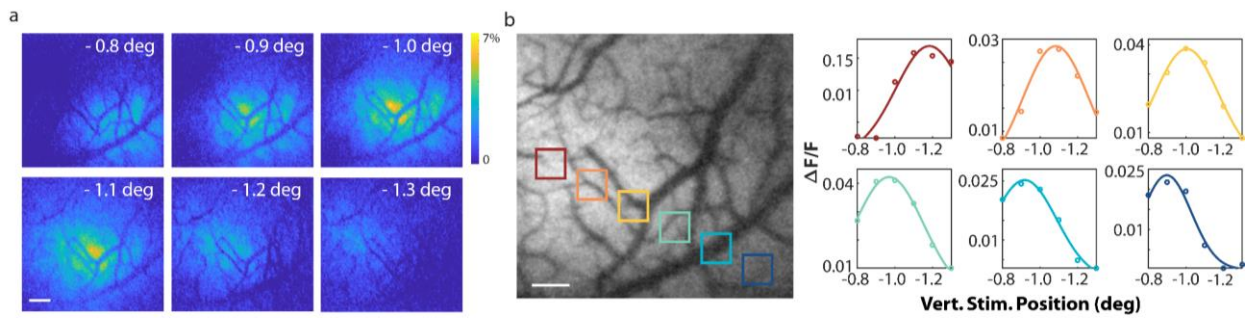

**Supplementary Fig. 10 | Additional results for spatial response profiles measured from V1 in the right hemisphere of a head-fixed NHP.** **a**, Response amplitude Bio-FlatScopeNHP at different stimulus conditions in one experiment session. Scale bar, 500  $\mu\text{m}$ . **b**, An example image captured and reconstructed using Bio-FlatScopeNHP (left). Spatial distribution of response amplitudes for different stimulus positions in Bio-FlatScopeNHP reconstructions (right) in one experiment session. Source data are provided as a Source Data file.

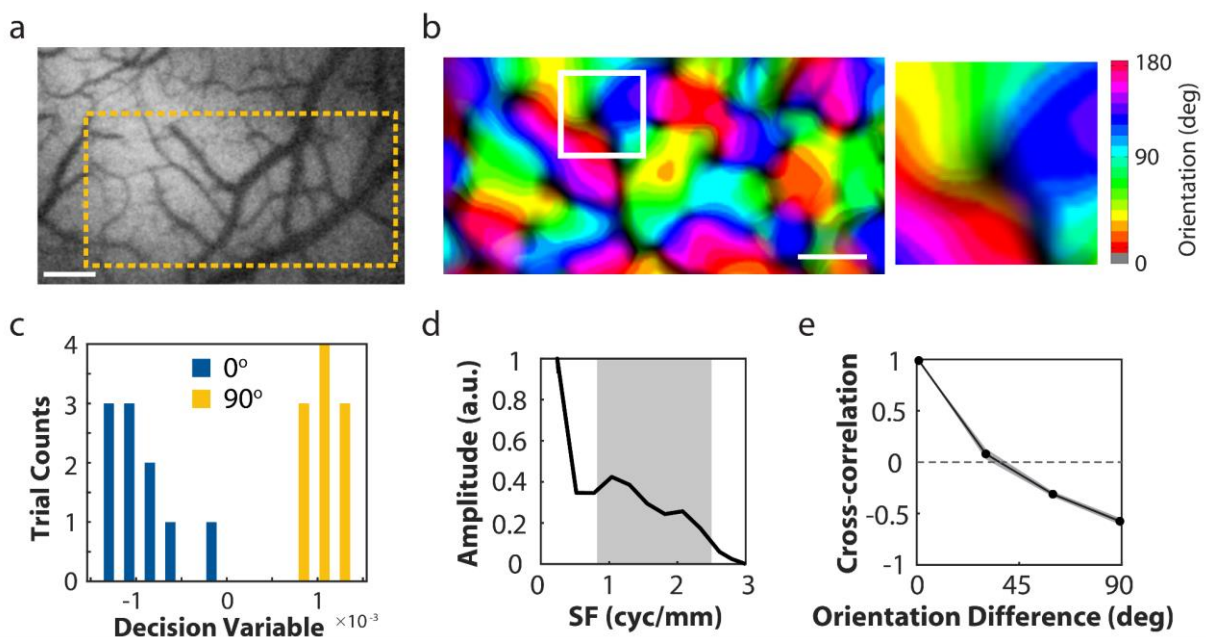

**Supplementary Fig. 11 | Additional results for columnar-scale signals measured from V1 in the right hemisphere of a head-fixed NHP.** **a**, Example image captured by Bio-FlatScopeNHP. Scale bar, 500  $\mu\text{m}$ . The yellow square indicates the selected overlapping ROI. **b**, Orientation map obtained by Bio-FlatScopeNHP. Scale bar, 500  $\mu\text{m}$ . **c**, Decision variables calculated from 0-degree and 90-degree trials captured by Bio-FlatScopeNHP. **d**, Normalized amplitude at different spatial frequencies obtained by Bio-FlatScopeNHP. The spatial filtration removes components outside spatial frequency between 0.8 and 2.5 cycles/mm, indicated by the shaded. **e**, Pairwise correlations between all six orientation maps as a function of stimulus orientation difference obtained by Bio-FlatScopeNHP. Shaded area  $\pm$  SEM. Source data are provided as a Source Data file.

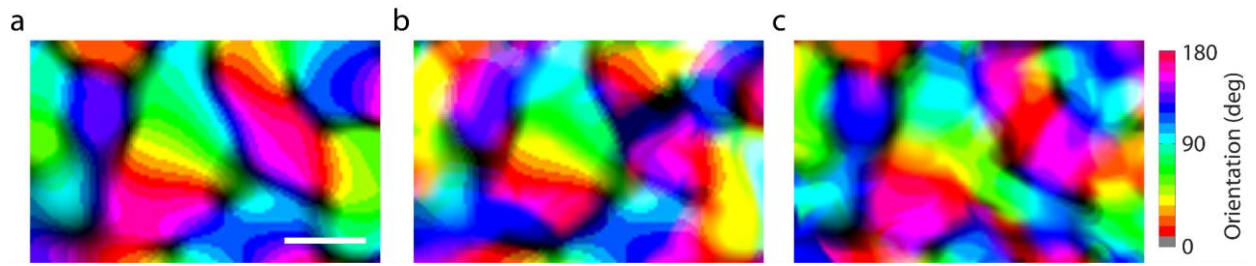

**Supplementary Fig. 12 | Comparison between head-fixed and head-unrestrained imaging using Bio-FlatScopeNHP in the same imaging session.** **a**, Orientation map obtained by the ground truth widefield microscope on the head-fixed macaque. Scale bar, 500  $\mu\text{m}$ . **b**, Orientation map obtained by Bio-FlatScopeNHP on the head-fixed macaque. **c**, Orientation map obtained by Bio-FlatScopeNHP on the head-unrestrained macaque.

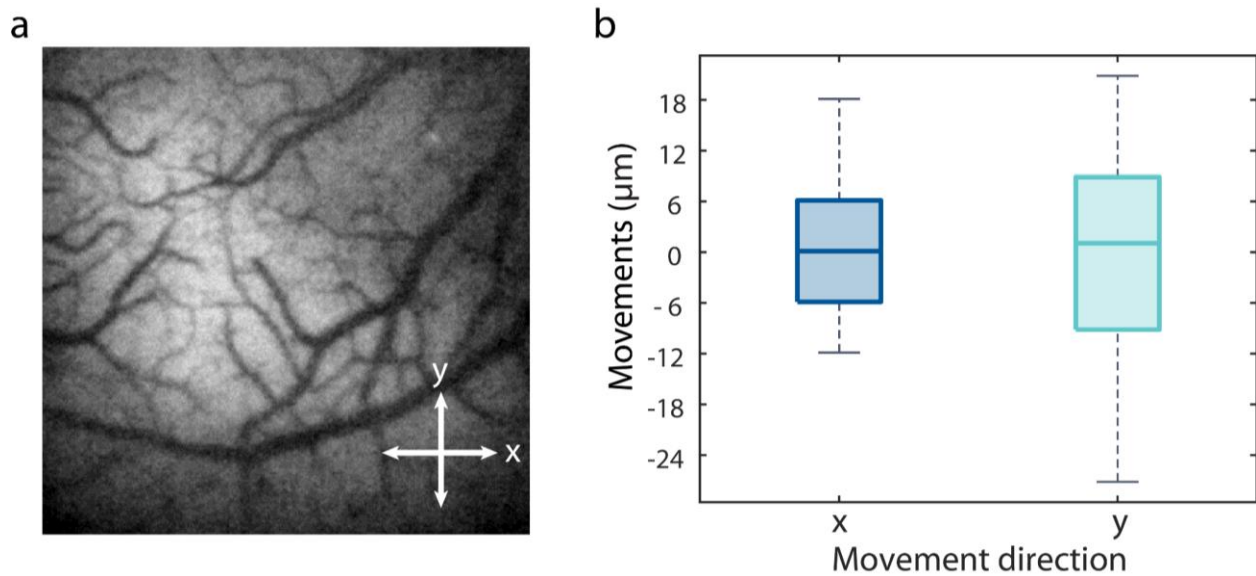

**Supplementary Fig. 13 | Stability of Bio-FlatScopeNHP imaging on a head-unrestrained macaque.** **a**, An example reconstruction of the Bio-FlatScope. x direction: medio-latera, y direction: anterior-posterior. **b**, FOV movements in 10 trials (220 frames) in two directions. Source data are provided as a Source Data file.

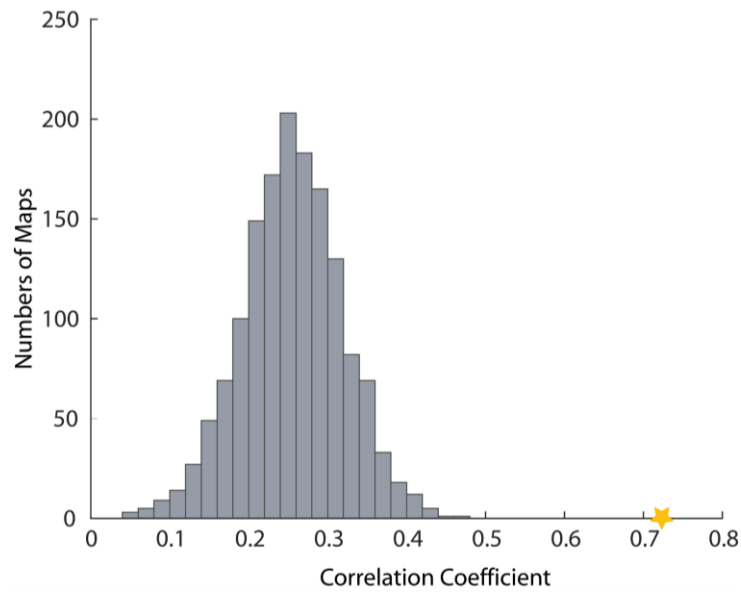

**Supplementary Fig. 14 | Correlation coefficient between random maps and ground truth.** Yellow star indicates the correlation coefficient obtained from the head-unrestrained macaque by Bio-FlatScopeNHP. Source data are provided as a Source Data file.

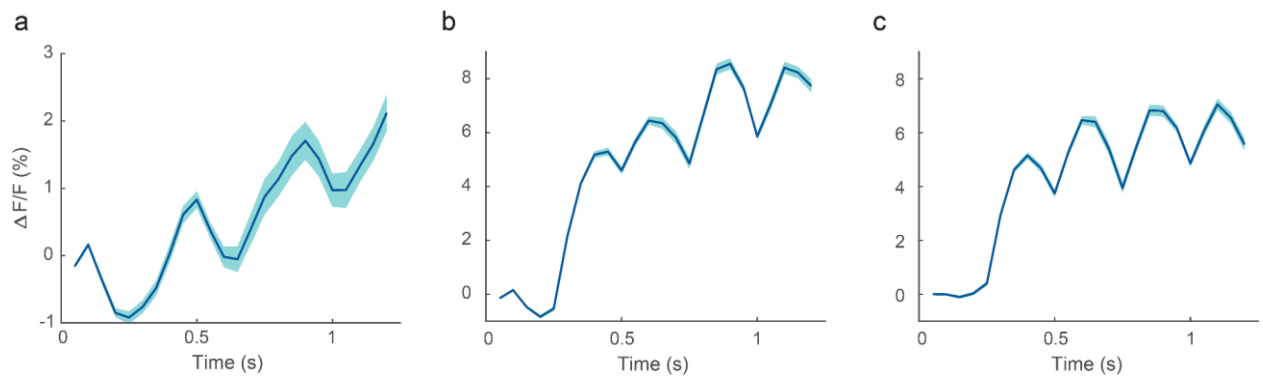

**Supplementary Fig. 15 | Heartbeat artifact removal.** a, Average time course of blank trials over the center 2 mm  $\times$  2 mm area of the FOV. The signal fluctuation is caused by the heartbeat. Shaded area  $\pm$  SEM. b, Average time course of GCaMP response to the flashed gratings (60 degree stimulus) over the center 2 mm  $\times$  2 mm area of the FOV before heartbeat artifact correction. Shaded area  $\pm$  SEM. c, Average time course of GCaMP response to the flashed gratings (60 degree stimulus) over the center 2 mm  $\times$  2 mm area of the FOV after heartbeat artifact correction. Shaded area  $\pm$  SEM. Data presented here were captured using the table-top widefield microscope. All traces represent average across 10 repeats. Source data are provided as a Source Data file.

### Supplementary References:

1. Zhou, Z. C., Yu, C., Sellers, K. K. & Fröhlich, F. Dorso-Lateral Frontal Cortex of the Ferret Encodes Perceptual Difficulty during Visual Discrimination. *Sci. Rep.* 6, 23568 (2016).
2. Scott, B. B. *et al.* Imaging Cortical Dynamics in GCaMP Transgenic Rats with a Head-Mounted Widefield Macroscope. *Neuron* 100, 1045-1058.e5 (2018).
3. Walker, J. D. *et al.* Chronic wireless neural population recordings with common marmosets. *Cell Rep.* 36, 109379 (2021).
4. Gilja, V., Chestek, C. A., Nuyujukian, P., Foster, J. & Shenoy, K. V. Autonomous head-mounted electrophysiology systems for freely behaving primates. *Curr. Opin. Neurobiol.* 20, 676–686 (2010).
5. Kondo, T. *et al.* Calcium Transient Dynamics of Neural Ensembles in the Primary Motor Cortex of Naturally Behaving Monkeys. *Cell Rep.* 24, 2191-2195.e4 (2018).
6. Bollimunta, A. *et al.* Head-mounted microendoscopic calcium imaging in dorsal premotor cortex of behaving rhesus macaque. *Cell Rep.* 35, 109239 (2021).
